# Supplementary material for: Paracrine Fibroblast Growth Factor 1 Functions as Potent Therapeutic Agent for Intrahepatic Cholestasis by Downregulating Synthesis of Bile Acid
Source: PubMed Central journal article supplement (PMC6933012; doi:10.3389/fphar.2019.01515), 2019-12-20
Supplement: DataSheet_1.pdf [file DataSheet_1.pdf]

## Supplementary Information

**Supplementary Table S1.** Primers of genes used for RT-PCR

| Gene Name      | Forward (5'-3')         | Reverse (5'-3')          |
|----------------|-------------------------|--------------------------|
| PCNA           | TTTGAGGCACGCCTGATCC     | GGAGACGTGAGACGAGTCCAT    |
| Ki67           | ATCATTGACCGCTCCTTTAGGT  | GCTCGCCTTGATGGTTCCT      |
| AFP            | CTTCCCTCATCCTCCTGCTAC   | ACAAACTGGGTAAAGGTGATGG   |
| Cyp7A1         | GGGATTGCTGTGGTAGTGAGC   | GGTATGGAATCAACCCGTTGTC   |
| Cyp27A1        | CCAGGCACAGGAGAGTACG     | GGGCAAGTGCAGCACATAG      |
| Cyp8B1         | CTAGGGCCTAAAGGTTGAGT    | GTAGCCGAATAAGCTCAGGAAG   |
| Cyp7B1         | GGAGCCACGACCCTAGATG     | GCCATGCCAAGATAAGGAAGC    |
| BSEP           | TCTGACTCAGTGATTCTTCGCA  | CCCATAAACATCAGCCAGTTGT   |
| MRP2           | GTGTGGATTCCCTTGGGCTTT   | CACAACGAACACCTGCTTGG     |
| MDR2           | CAGCGAGAAACGGAACAGCA    | TCAGAGTATCGGAACAGTGTCA   |
| NTCP           | CAAACCTCAGAAGGACCAAACA  | GTAGGAGGATTATTTCCCGTTGTG |
| OATP1          | GTGCATACCTAGCCAAATCACT  | CCAGGCCATAACCACACATC     |
| OATP2          | GGGAACATGCTTCGTGGGATA   | GGAGTTATGCGGACACTTCTC    |
| $\beta$ -actin | GTGACGTTGACATCCGTAAAGA  | GCCGGACTCATCGTACTCC      |
| FGF1           | GGGGAGATCACAACCTTCGC    | GTCCCTTGTCATCCACG        |
| FGF2           | GCGACCCACACGTCAAATA     | TCCCTTGATAGACACAACCTCCTC |
| FGF3           | TGCGCTACCAAGTACCACC     | CACCGCAGTAATCTCCAGGAT    |
| FGF4           | TACCCCGGTATGTTTCATGGC   | TTACCTTCATGGTAGGCGACA    |
| FGF5           | GTACGTGGCCCTGAACAAGA    | CGGTGAAGGAAAGTTCCGGT     |
| FGF6           | CAGGCTCTCGTCTTCTTAGGC   | AATAGCCGCTTTCCCAATTCA    |
| FGF7           | TGGGCACTATATCTCTAGCTTGC | GGGTGCGACAGAACAGTCT      |
| FGF8           | GGAACCCAGCTGACTCTC      | TCTTCTGCCATGGCGTTGAT     |
| FGF9           | ATGGCTCCCTTAGGTGAAGTT   | TCCGCCTGAGAATCCCCTTT     |
| FGF10          | TTTGGTGTCTTCGTTCCCTGT   | TAGCTCCGCACATGCCTTC      |
| FGF16          | GTGTTTTCCGGGAACAGTTTGA  | GGTGAGCCGTCTTTATTCAGG    |

|       |                         |                        |
|-------|-------------------------|------------------------|
| FGF17 | GCGGCAAATCCGTGAATACC    | GGCCGTGTAGTTGTTCTCCA   |
| FGF18 | GCCCTGATGTCTGCCAAGTA    | CCCTTGGGGTAACGCTTCAT   |
| FGF20 | AGGATCACAGTCTCTTCGGTATC | GTCATTCATCCCAAGGTACAGG |
| FGF22 | GGAGATCCGTTCTGTCCGTG    | TCCCGGAACCGACCCAT      |

**Supplementary Table S2.** Relative mRNA levels of all paracrine FGFs between ANIT-induced cholestasis model and the vehicle group

| <b>Gene Name</b> | <b>Vehicle group</b> | <b>ANIT-induced model</b> | <b>P value</b> |
|------------------|----------------------|---------------------------|----------------|
| FGF1             | 1.022 ± 0.0551       | 0.4078 ± 0.0602           | <0.0001        |
| FGF2             | 1.084 ± 0.1451       | 0.7949 ± 0.0693           | 0.0938         |
| FGF3             | Undetectable         | Undetectable              | Undetectable   |
| FGF4             | 1.066 ± 0.129        | 0.9022 ± 0.2246           | 0.5385         |
| FGF5             | Undetectable         | Undetectable              | Undetectable   |
| FGF6             | 1.093 ± 0.1759       | 1.702 ± 0.6546            | 0.3845         |
| FGF7             | 1.201 ± 0.2306       | 0.9238 ± 0.3158           | 0.4893         |
| FGF8             | Undetectable         | Undetectable              | Undetectable   |
| FGF9             | 1.106 ± 0.1361       | 0.741 ± 0.2351            | 0.2002         |
| FGF10            | 1.113 ± 0.1915       | 0.7422 ± 0.3422           | 0.3609         |
| FGF16            | 1.148 ± 0.2165       | 0.8751 ± 0.3386           | 0.5081         |
| FGF17            | Undetectable         | Undetectable              | Undetectable   |
| FGF18            | 1.098 ± 0.1626       | 1.157 ± 0.2752            | 0.8580         |
| FGF20            | Undetectable         | Undetectable              | Undetectable   |
| FGF22            | Undetectable         | Undetectable              | Undetectable   |
